# Supplementary material for: Aspergillus luchuensis, an Endophyte Fungus from the Metal Hyperaccumulator Plant Prosopis laevigata, Promotes Its Growth and Increases Metal Translocation
Source: MDPI journal article supplement (doi:10.3390/plants12061338), 2023-03-16
Supplement: s1 [file s1]

**Supplementary Table S1.** Discriminant function analysis for size character variation of *P. laevigata* in different exposure times (six months) growing under greenhouse conditions. The bold letters show the variable that most contribute to the DFA ordination.

| Variable         | DF1           | DF2           | DF1           | DF2            |
|------------------|---------------|---------------|---------------|----------------|
|                  | Month 1       |               | Month 2       |                |
| Dry root biomass | <b>-53.85</b> | -5.64         | 20.99         | 5.04           |
| Dry leaf biomass | -28.32        | <b>31.37</b>  | <b>141.05</b> | <b>154.23</b>  |
| Height           | -0.59         | 0.67          | -0.16         | -0.75          |
| Number of leaves | -0.05         | 0.01          | -0.05         | -0.17          |
| Wet root biomass | 5.47          | 5.89          | -2.78         | 1.85           |
| Wet leaf biomass | <b>105.24</b> | <b>-36.98</b> | <b>-41.35</b> | <b>-41.90</b>  |
| Eigenvalue       | 14.87         | 3.68          | 4.30          | 0.70           |
| % Variation      | 79.88         | 19.78         | 84.72         | 13.75          |
| Significance     | < 0.001       | < 0.001       | < 0.001       | < 0.001        |
|                  | Month 3       |               | Month 4       |                |
| Dry root biomass | -27.29        | <b>-13.50</b> | 4.80          | 27.16          |
| Dry leaf biomass | <b>144.34</b> | <b>29.12</b>  | <b>17.31</b>  | <b>112.04</b>  |
| Height           | 0.38          | -0.36         | <b>-0.25</b>  | 0.21           |
| Number of leaves | 0.06          | 0.06          | 0.00          | -0.05          |
| Wet root biomass | 5.94          | 2.75          | 2.59          | -6.95          |
| Wet leaf biomass | <b>-53.54</b> | -10.50        | 1.18          | <b>-35.76</b>  |
| Eigenvalue       | 8.43          | 0.49          | 2.68          | 1.01           |
| % Variation      | 94.24         | 5.53          | 68.69         | 25.74          |
| Significance     | < 0.001       | < 0.001       | < 0.001       | < 0.001        |
|                  | Month 5       |               | Month 6       |                |
| Dry root biomass | 4.28          | 1.73          | 0.26          | 5.11           |
| Dry leaf biomass | <b>-6.17</b>  | <b>23.36</b>  | <b>-24.16</b> | <b>-106.77</b> |
| Height           | 0.14          | -0.21         | -0.14         | 0.12           |
| Number of leaves | 0.01          | -0.06         | 0.02          | 0.01           |
| Wet root biomass | -0.06         | <b>-0.69</b>  | 1.91          | -2.06          |
| Wet leaf biomass | <b>6.94</b>   | 11.98         | <b>11.86</b>  | <b>57.12</b>   |
| Eigenvalue       | 5.90          | 0.29          | 5.57          | 0.22           |
| % Variation      | 93.99         | 4.61          | 95.17         | 3.67           |
| Significance     | < 0.001       | < 0.001       | < 0.001       | < 0.001        |

**Supplementary Table S2.** Average values ( $\pm$  standard deviation) of heavy metal concentration (mg Kg<sup>-1</sup>) in root and leaf of *Prosopis laevigata* growing on tailing substrate under greenhouse conditions.

| Metal             | Time    | Tailing              |                    |                      |                    |
|-------------------|---------|----------------------|--------------------|----------------------|--------------------|
|                   |         | With fungi           |                    | Without fungi        |                    |
|                   |         | root                 | leaf               | root                 | leaf               |
| DL (mg/L)         | (month) |                      |                    |                      |                    |
| Lead Pb (0.01)    | 1       | 36.35 $\pm$ 3.35     | 150.87 $\pm$ 67.05 | 12.39 $\pm$ 3.43     | 4.05 $\pm$ 1.19    |
|                   | 2       | 92.10 $\pm$ 33.26    | 239.48 $\pm$ 47.85 | 180.20 $\pm$ 44.46   | 228.38 $\pm$ 61.73 |
|                   | 3       | 34.58 $\pm$ 9.92     | 281.49 $\pm$ 86.28 | 30.84 $\pm$ 9.93     | 311.40 $\pm$ 97.66 |
|                   | 4       | 28.78 $\pm$ 13.23    | 35.15 $\pm$ 6.84   | 15.47 $\pm$ 6.13     | 40.10 $\pm$ 12.21  |
|                   | 5       | 17.21 $\pm$ 7.09     | 69.45 $\pm$ 11.81  | 4.35 $\pm$ 2.91      | 30.46 $\pm$ 33.63  |
|                   | 6       | 20.95 $\pm$ 5.40     | 111.89 $\pm$ 42.01 | 52.78 $\pm$ 8.49     | 98.61 $\pm$ 11.21  |
| Copper Cu (0.001) | 1       | 24.20 $\pm$ 7.79     | 2.61 $\pm$ 1.31    | 7.12 $\pm$ 3.85      | 2.17 $\pm$ 0.82    |
|                   | 2       | 3.39 $\pm$ 1.29      | 3.14 $\pm$ 0.27    | 4.47 $\pm$ 2.98      | 5.18 $\pm$ 2.57    |
|                   | 3       | 1.85 $\pm$ 0.92      | 7.32 $\pm$ 3.28    | 0.82 $\pm$ 0.28      | 5.98 $\pm$ 2.64    |
|                   | 4       | 5.47 $\pm$ 3.21      | 9.34 $\pm$ 3.42    | 6.12 $\pm$ 1.08      | 19.88 $\pm$ 5.97   |
|                   | 5       | 1.21 $\pm$ 0.29      | 10.20 $\pm$ 3.20   | 1.72 $\pm$ 1.44      | 14.19 $\pm$ 3.75   |
|                   | 6       | 2.02 $\pm$ 0.99      | 34.18 $\pm$ 9.04   | 7.22 $\pm$ 2.26      | 42.91 $\pm$ 14.75  |
| Zinc Zn (0.0005)  | 1       | 3857.24 $\pm$ 786.27 | 240.08 $\pm$ 78.11 | 2457.04 $\pm$ 841.54 | 4.30 $\pm$ 0.904   |
|                   | 2       | 21.87 $\pm$ 7.28     | 7.37 $\pm$ 3.17    | 31.64 $\pm$ 15.18    | 15.66 $\pm$ 6.51   |
|                   | 3       | 15.13 $\pm$ 3.65     | 93.84 $\pm$ 36.74  | 12.89 $\pm$ 4.04     | 52.33 $\pm$ 7.40   |
|                   | 4       | 10.60 $\pm$ 4.94     | 15.08 $\pm$ 5.63   | 25.59 $\pm$ 7.73     | 85.61 $\pm$ 49.18  |
|                   | 5       | 16.70 $\pm$ 7.25     | 43.90 $\pm$ 13.96  | 25.86 $\pm$ 11.44    | 158.78 $\pm$ 42.97 |
|                   | 6       | 13.03 $\pm$ 5.87     | 130.02 $\pm$ 38.69 | 76.28 $\pm$ 14.96    | 65.33 $\pm$ 14.74  |

**Supplementary Table S3.** Simple regression analysis between exposure time and size characters of *Prosopis laevigata* individuals growing under greenhouse conditions. The bold letters denote significant differences.

| Treatment (substrate)                        |                                                                                     |                                              |                                                                                     |                                              |                                                                                       |
|----------------------------------------------|-------------------------------------------------------------------------------------|----------------------------------------------|-------------------------------------------------------------------------------------|----------------------------------------------|---------------------------------------------------------------------------------------|
| Control                                      |                                                                                     |                                              | Tailing                                                                             |                                              |                                                                                       |
| with fungi                                   |                                                                                     | without fungi                                | with fungi                                                                          |                                              | without fungi                                                                         |
| <b>Dry root biomass</b>                      |                                                                                     |                                              |                                                                                     |                                              |                                                                                       |
| $r = 0.765$<br>$r^2 = 0.573$<br>$P = 0.0000$ | 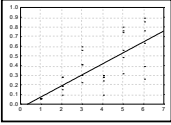   | $r = 0.667$<br>$r^2 = 0.429$<br>$P = 0.0000$ |    | $r = 0.354$<br>$r^2 = 0.099$<br>$P = 0.034$  |     |
|                                              |                                                                                     |                                              |                                                                                     | $r = 0.436$<br>$r^2 = 0.166$<br>$P = 0.008$  |    |
| <b>Dry leaf biomass</b>                      |                                                                                     |                                              |                                                                                     |                                              |                                                                                       |
| $r = 0.422$<br>$r^2 = 0.153$<br>$P = 0.01$   |    | $r = 0.226$<br>$r^2 = 0.022$<br>$P = 0.186$  |    | $r = 0.245$<br>$r^2 = 0.032$<br>$P = 0.149$  |     |
|                                              |                                                                                     |                                              |                                                                                     | $r = -0.086$<br>$r^2 = 0.021$<br>$P = 0.617$ |    |
| <b>Height</b>                                |                                                                                     |                                              |                                                                                     |                                              |                                                                                       |
| $r = 0.340$<br>$r^2 = 0.090$<br>$P = 0.042$  |    | $r = -0.234$<br>$r^2 = 0.027$<br>$P = 0.169$ |    | $r = 0.227$<br>$r^2 = 0.023$<br>$P = 0.184$  |     |
|                                              |                                                                                     |                                              |                                                                                     | $r = 0.095$<br>$r^2 = 0.020$<br>$P = 0.580$  |    |
| <b>Number of leaves</b>                      |                                                                                     |                                              |                                                                                     |                                              |                                                                                       |
| $r = 0.734$<br>$r^2 = 0.524$<br>$P = 0.0000$ |  | $r = 0.533$<br>$r^2 = 0.263$<br>$P = 0.0008$ |  | $r = 0.250$<br>$r^2 = 0.035$<br>$P = 0.141$  |   |
|                                              |                                                                                     |                                              |                                                                                     | $r = 0.294$<br>$r^2 = 0.059$<br>$P = 0.082$  |  |
| <b>Wet root biomass</b>                      |                                                                                     |                                              |                                                                                     |                                              |                                                                                       |
| $r = 0.736$<br>$r^2 = 0.528$<br>$P = 0.0000$ |  | $r = 0.665$<br>$r^2 = 0.426$<br>$P = 0.0000$ |  | $r = -0.354$<br>$r^2 = 0.100$<br>$P = 0.033$ |   |
|                                              |                                                                                     |                                              |                                                                                     | $r = 0.425$<br>$r^2 = 0.156$<br>$P = 0.009$  |  |
| <b>Wet leaf biomass</b>                      |                                                                                     |                                              |                                                                                     |                                              |                                                                                       |
| $r = 0.354$<br>$r^2 = 0.099$<br>$P = 0.034$  |  | $r = 0.397$<br>$r^2 = 0.132$<br>$P = 0.0167$ |  | $r = -0.060$<br>$r^2 = 0.025$<br>$P = 0.732$ |   |
|                                              |                                                                                     |                                              |                                                                                     | $r = -0.110$<br>$r^2 = 0.017$<br>$P = 0.533$ |  |

**Supplementary Table S4.** Simple regression analysis between exposure time and heavy metal bioaccumulation in root and leaf of *Prosopis laevigata* growing under greenhouse conditions. The bold letters denote significant differences.

| Metal       | Treatment (substrate)                                                                                                                  |                                                                                                                                |                                                                                                                                           |                                                                                                                                  |
|-------------|----------------------------------------------------------------------------------------------------------------------------------------|--------------------------------------------------------------------------------------------------------------------------------|-------------------------------------------------------------------------------------------------------------------------------------------|----------------------------------------------------------------------------------------------------------------------------------|
|             | Leaf                                                                                                                                   |                                                                                                                                | Root                                                                                                                                      |                                                                                                                                  |
|             | with fungi                                                                                                                             | without fungi                                                                                                                  | with fungi                                                                                                                                | without fungi                                                                                                                    |
| Lead (Pb)   | $r = -0.53$<br>$r^2 = 0.095$<br>$P = 0.284$ 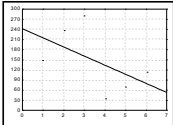          | $r = -0.07$<br>$r^2 = 0.243$<br>$P = 0.895$   | $r = -0.60$<br>$r^2 = 0.200$<br>$P = 0.207$            | $r = -0.27$<br>$r^2 = 0.157$<br>$P = 0.601$   |
| Copper (Cu) | $r = 0.826$<br>$r^2 = 0.603$<br>$P = \mathbf{0.043}$  | $r = -0.690$<br>$r^2 = 0.338$<br>$P = 0.132$  | $r = -0.864$<br>$r^2 = 0.682$<br>$P = \mathbf{0.026}$  | $r = -0.030$<br>$r^2 = 0.249$<br>$P = 0.953$  |
| Zinc (Zn)   | $r = -0.320$<br>$r^2 = 0.125$<br>$P = 0.542$          | $r = 0.737$<br>$r^2 = 0.430$<br>$P = 0.094$   | $r = -0.650$<br>$r^2 = 0.285$<br>$P = 0.158$           | $r = -0.640$<br>$r^2 = 0.267$<br>$P = 0.168$  |
